# Supplementary material
Source: MDPI journal article supplement (https://www.mdpi.com/2073-4441/10/12/1865)
Supplement: s1 [file s1]

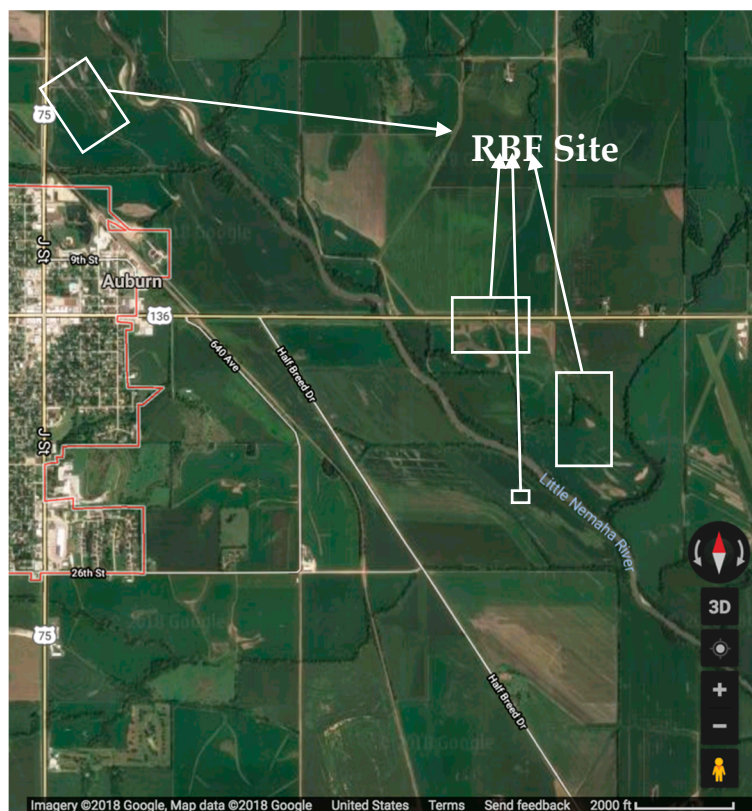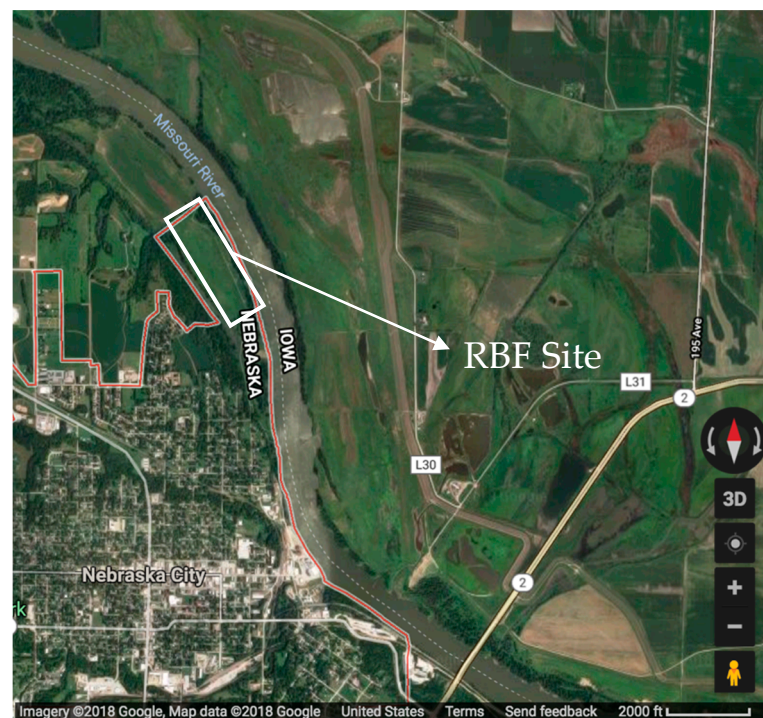

**Figure S1.** RBF wells' sites: Auburn (left) and Nebraska City (right).

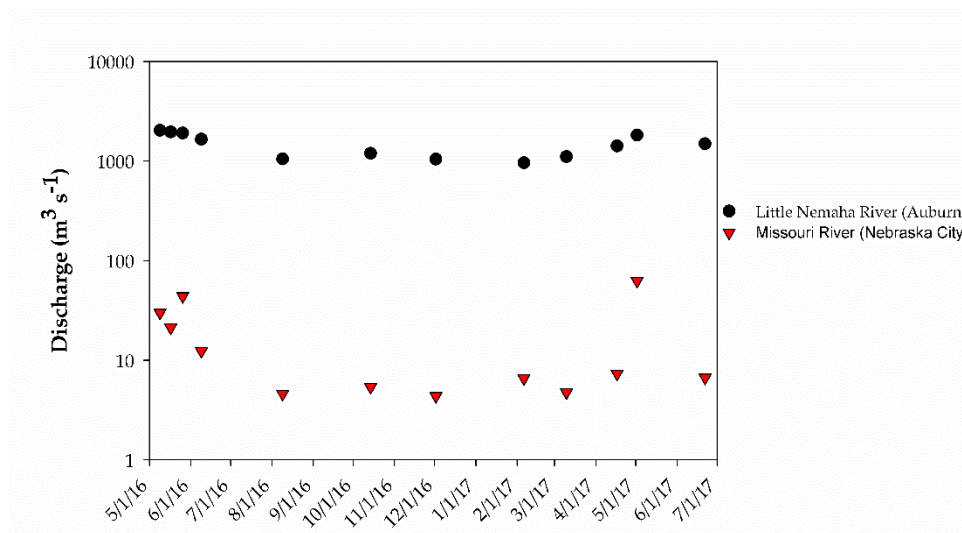

**Figure S2.** Discharge from the Little Nemaha River (Auburn) and Missouri River (Nebraska City). Source: <https://waterdata.usgs.gov/nwis>

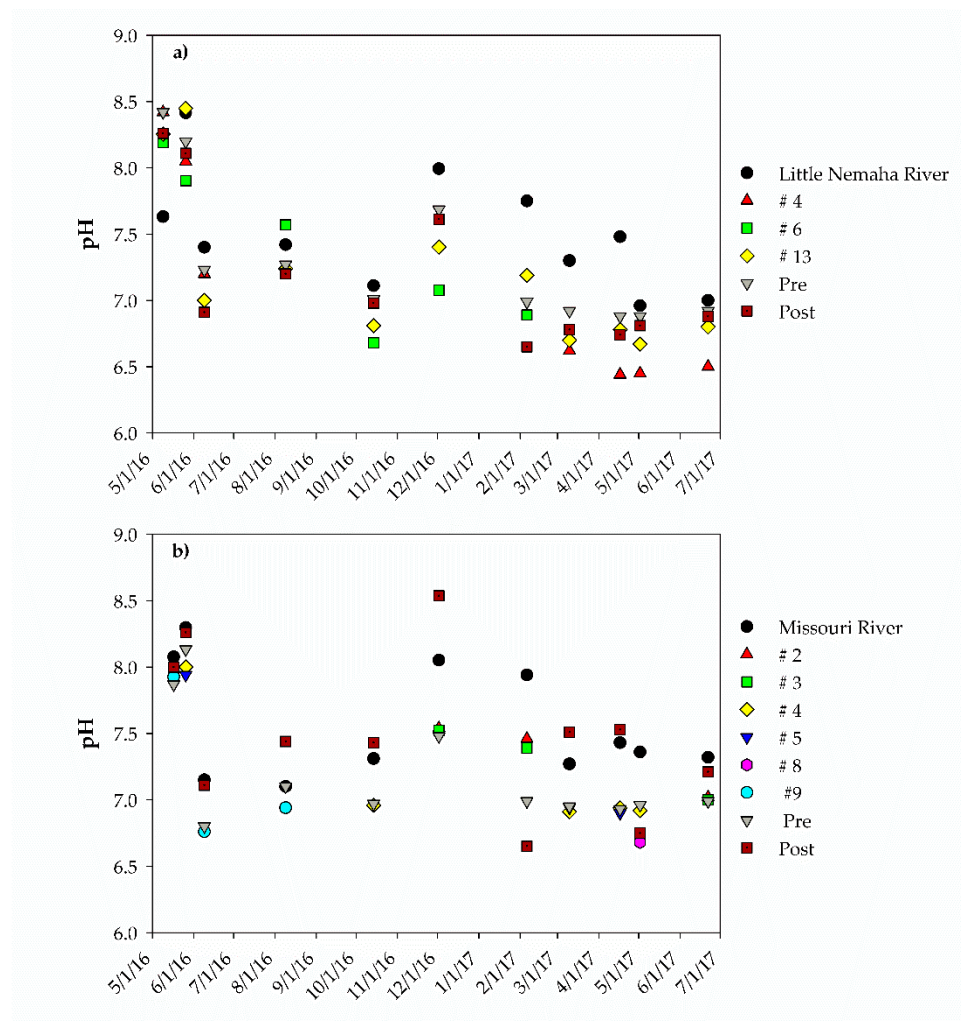

**Figure S3.** pH in a) Auburn and b) Nebraska City. LNR: Little Nemaha River; MR: Missouri River; Pre: Inflow water to the water treatment plants prior to any additional treatment; Post: water collected at the two water treatment plants after chlorination.

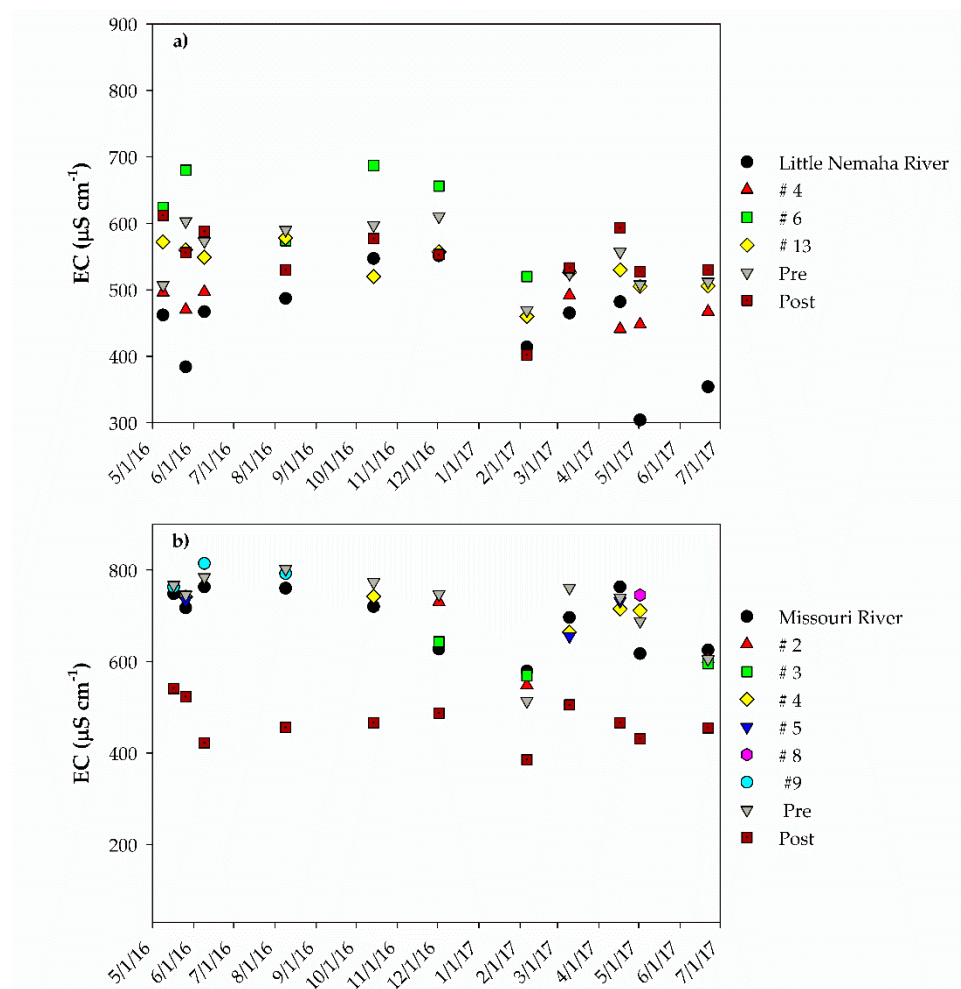

**Figure S4.** Electrical conductivity (EC) in a) Auburn and b) Nebraska City. LNR: Little Nemaha River; MR: Missouri River; Pre: Inflow water to the water treatment plants prior to any additional treatment; Post: water collected at the two water treatment plants after chlorination.



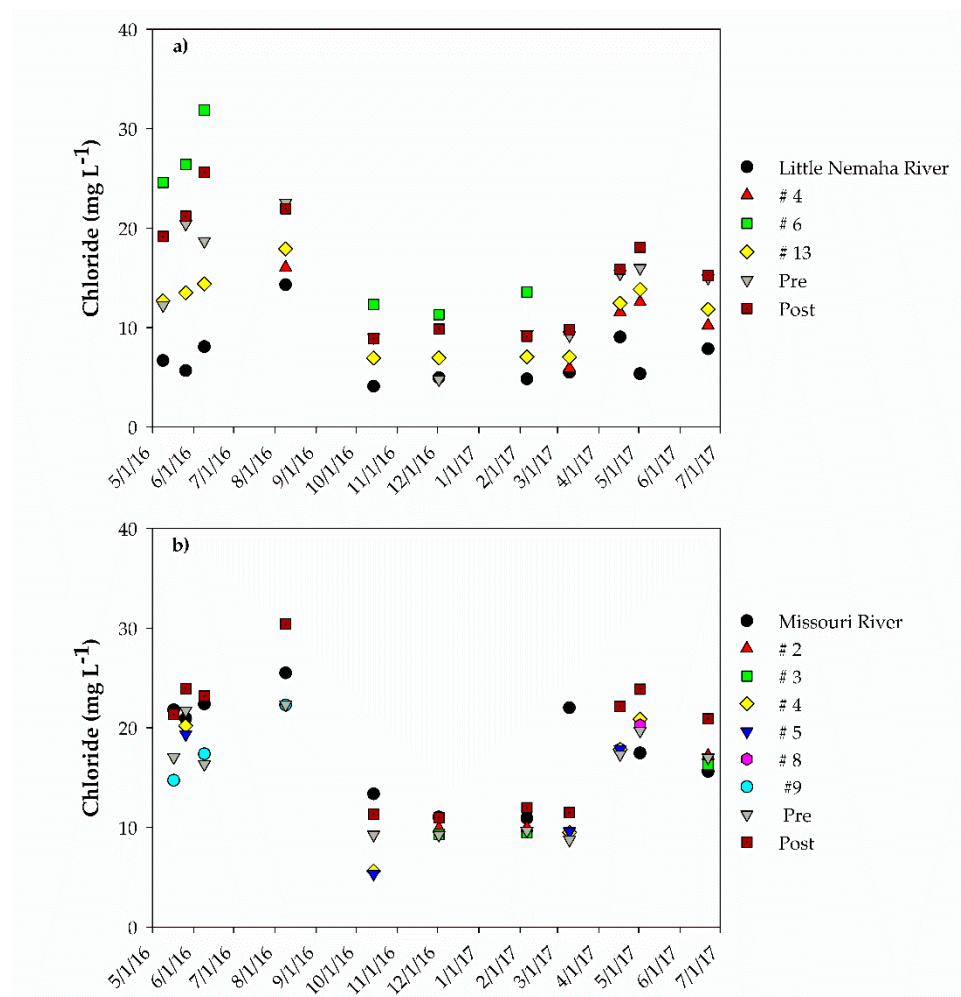

**Figure S5.** Chloride in a) Auburn and b) Nebraska City. LNR: Little Nemaha River; MR: Missouri River; Pre: Inflow water to the water treatment plants prior to any additional treatment; Post: water collected at the two water treatment plants after chlorination.

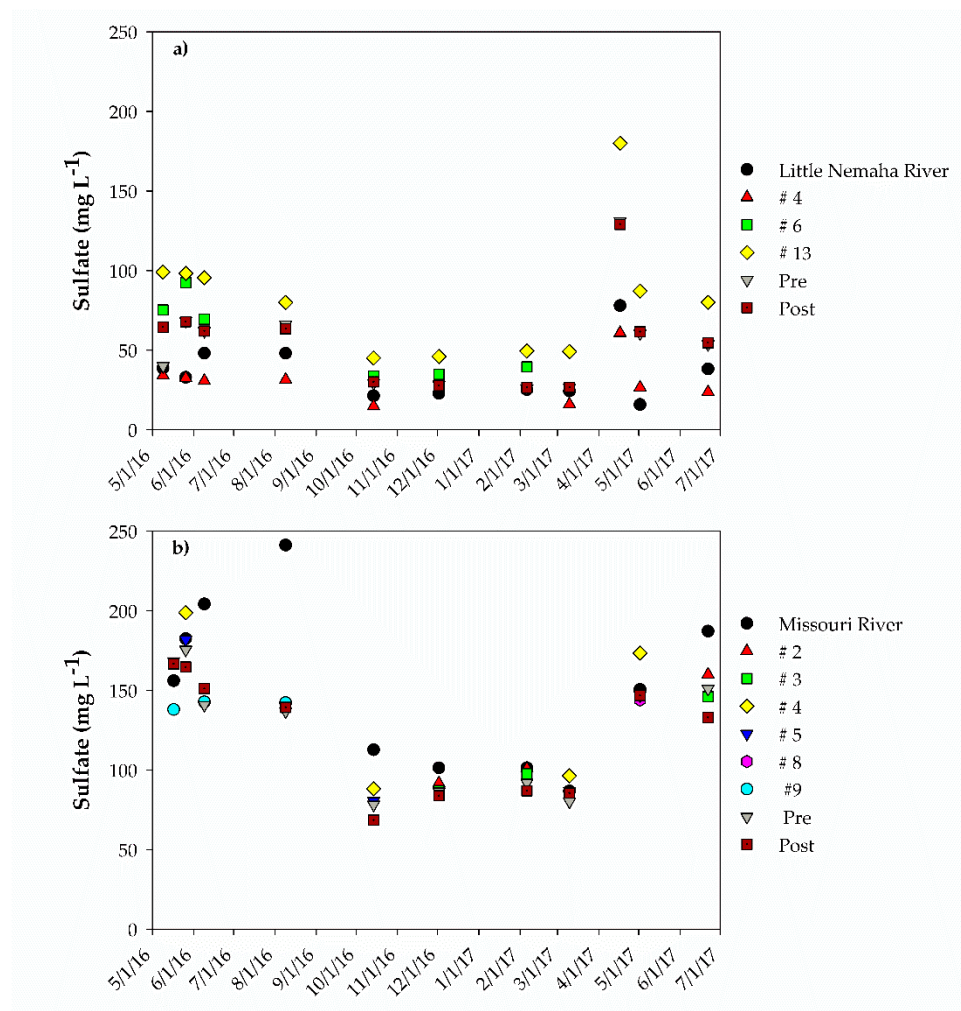

**Figure S6.** Sulfate in a) Auburn and b) Nebraska City. LNR: Little Nemaha River; MR: Missouri River; Pre: Inflow water to the water treatment plants prior to any additional treatment; Post: water collected at the two water treatment plants after chlorination.

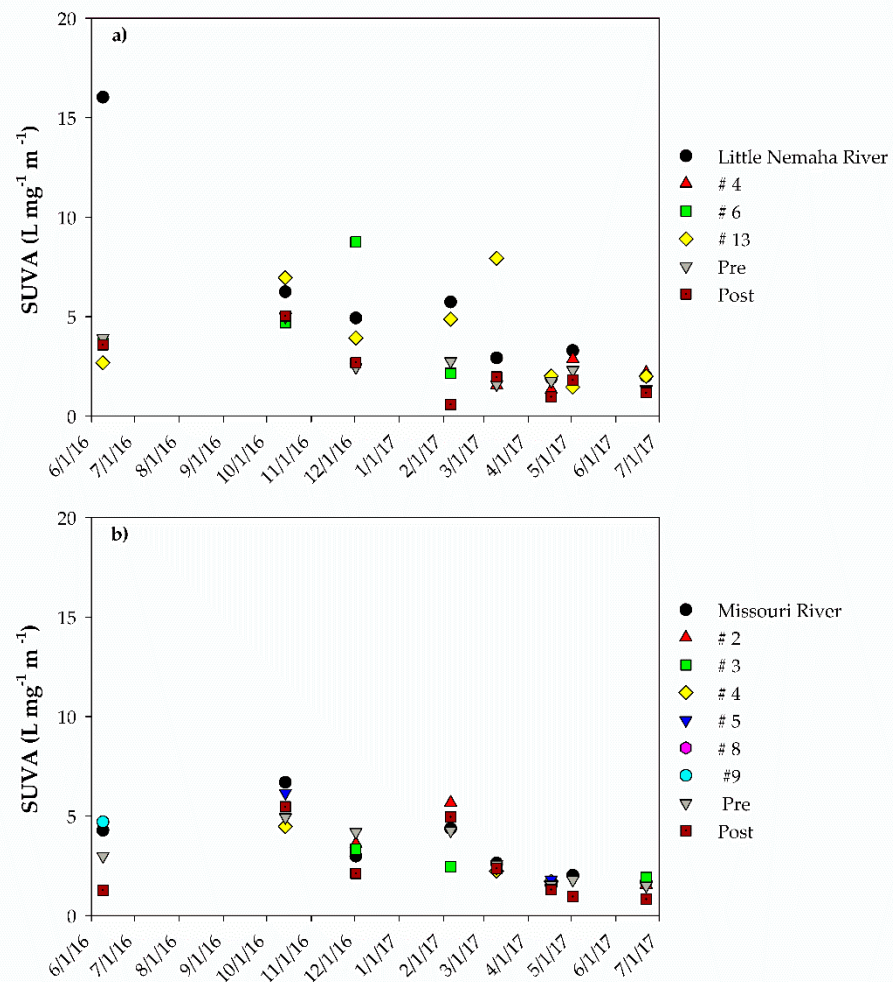

**Figure S7.** Specific UV-absorbance (SUVA) in a) Auburn and b) Nebraska City. LNR: Little Nemaha River; MR: Missouri River; Pre: Inflow water to the water treatment plants prior to any additional treatment; Post: water collected at the two water treatment plants after chlorination.

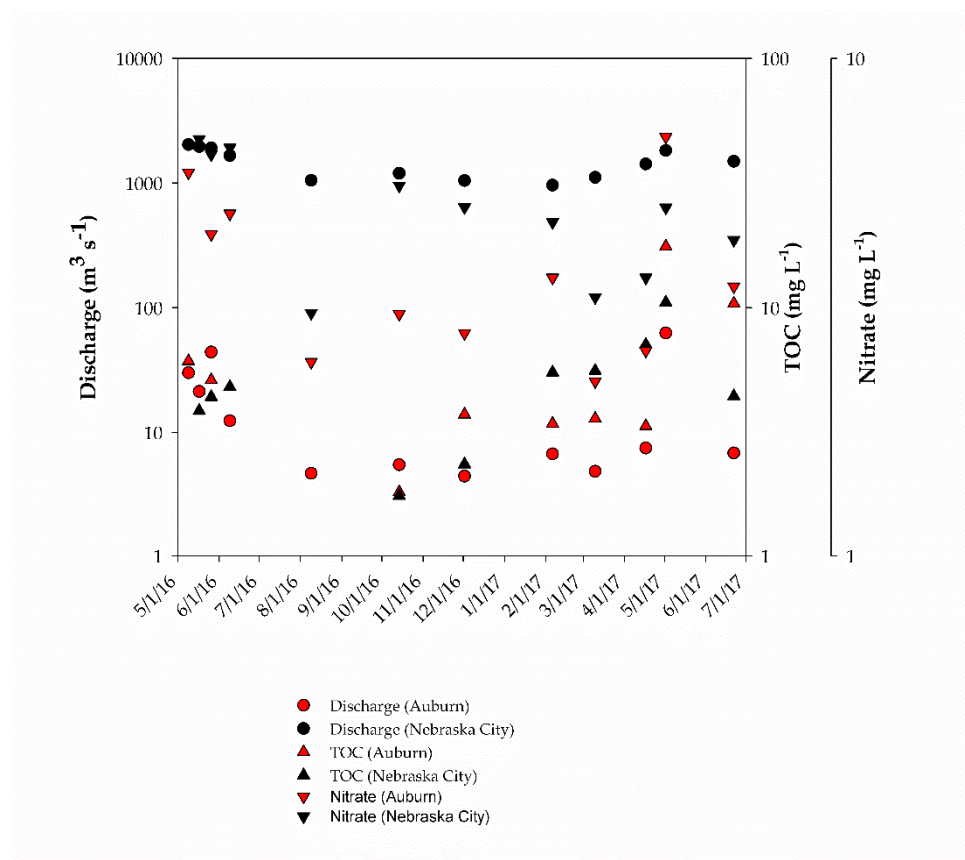

**Figure S8.** Discharge, total organic carbon (TOC) and nitrate at the two sampling locations along the Little Nemaha River (Auburn) and Missouri River (Nebraska City).



**Table S1.** Characteristics of wells at the two RBF sites.

| Well ID       | Outside Diameter (m) | Depth (m) | Screen (m) | Static Water Level (m) | Construction |
|---------------|----------------------|-----------|------------|------------------------|--------------|
| Auburn        |                      |           |            |                        |              |
| 1             | 0.61                 | 18.75     | 4.58       | 3.51                   | 1981         |
| 2             | 0.61                 | 17.68     | 4.58       | 3.35                   | 1981         |
| 3             | 0.61                 | 17.68     | 4.58       | 3.66                   | 1981         |
| 4             | 0.61                 | 15.55     | 4.72       | 3.20                   | 1981         |
| 5             | 0.61                 | 14.17     | 4.72       | 3.51                   | 1981         |
| 6             | 0.61                 | 15.70     | 4.58       | 4.27                   | 1981         |
| 13            | 0.91                 | 14.63     | 4.58       | 5.18                   | 2004         |
| 19            | 0.61                 | 13.41     | 4.58       | 3.96                   | 1946         |
| 20            | 0.46                 | 13.87     | 4.58       | 3.66                   | 1966         |
| Nebraska City |                      |           |            |                        |              |
| 1             | 0.64                 | 25.30     | 8.53       | 2.36                   | 1956         |
| 2             | 0.64                 | 29.26     | 8.53       | 2.34                   | 1956         |
| 3             | 0.64                 | 25.60     | 8.53       | 2.59                   | 1956         |
| 4             | 0.64                 | 25.60     | 10.97      | 4.57                   | 1964         |
| 5             | 0.64                 | 25.60     | 10.97      | 2.59                   | 1969         |
| 6             | 0.41                 | 27.74     | 9.14       | 2.57                   | 1981         |
| 7             | 0.41                 | 25.60     | 12.19      | 3.79                   | 1981         |
| 8             | 0.61                 | 27.13     | 9.14       | 6.50                   | 2001         |
| 9             | 0.61                 | 28.65     | 13.41      | 6.78                   | 2001         |
| 10            | 0.46                 | 25.60     | 9.75       | 2.44                   | 2010         |
| 11            | 0.46                 | 25.60     | 9.75       | 3.05                   | 2010         |

**Table S2.** Auburn – Geological formations at the riverbank filtration site.

| Well #1                                                             | Well #2                                      | Well #3                                                | Well #4                                     | Well #5                                          | Well #6                                           | Well #13                              | Well #19                                    |
|---------------------------------------------------------------------|----------------------------------------------|--------------------------------------------------------|---------------------------------------------|--------------------------------------------------|---------------------------------------------------|---------------------------------------|---------------------------------------------|
| 0-1.5 m*<br>Top soil                                                | 0-1.5 m<br>Top soil                          | 0-1.5 m<br>Top soil                                    | 0-1.5 m<br>Top soil                         | 0-1.5 m<br>Top soil                              | 0-1.5 m<br>Top soil                               | 0-0.9 m<br>Top soil                   | 0-1.2 m<br>Top soil                         |
| 1.5-6.1 m<br>Brown and very sticky clay                             | 1.5-5.5 m<br>Brown clay                      | 1.5-6.1 m<br>Brown clay                                | 1.5-3.0 m<br>Brown clay                     | 1.5-6.1 m<br>Gray clay                           | 1.5-6.4 m<br>Gray clay                            | 0.9-7.3 m<br>Gray clay                | 1.2-3.4 m<br>Gray clay                      |
| 6.1-7.6 m<br>Fine buff sand                                         | 5.5-12.2 m<br>Coarse sand and some fine sand | 6.1-10.1 m<br>Gray clay                                | 3.0-7.9 m<br>Gray clay                      | 6.1-7.6 m<br>Fine sand                           | 6.4-8.5 m<br>Coarse sand and some fine sand       | 7.3-10.4 m<br>Fine and medium sand    | 3.4-6.4 m<br>Brown clay                     |
| 7.6-10.7 m<br>Coarse sand and some fine sand                        | 12.2-14.5 m<br>Coarse sand and some boulders | 10.1-10.7 m<br>Sandy clay and boulders and coarse sand | 7.9-12.2 m<br>Fine sand and some coarse     | 7.6-10.4 m<br>Fine sand                          | 8.5-11.6 m<br>Coarse sand and gravel, blue color  | 10.4-14.6 m<br>Medium and coarse sand | 6.4-10.1 m<br>Gravel, coarse and fine sand  |
| 10.7-15.8 m<br>Coarse sand and gravel                               |                                              | 10.7-13.1 m<br>Coarse sand                             | 12.2-12.8 m<br>Gray clay                    | 10.4-12.2 m<br>Coarse sand and trace of boulders | 11.6-13.1 m<br>Coarse sand and gravel, blue color |                                       | 10.1-10.2 m<br>Clay                         |
| 15.8 m<br>Blue shale                                                |                                              | 13.1-13.7 m<br>Blue clay                               | 12.8-14.0 m<br>Coarse sand and small gravel | 12.2 m<br>Red shale                              | 13.1 m<br>Blue and red shale                      |                                       | 10.2-13.7 m<br>Gravel, coarse and fine sand |
|                                                                     |                                              | 13.7-16.5 m<br>Coarse sand and trace of boulders       | 14.0 m<br>Fine sand                         |                                                  |                                                   |                                       | 13.7 m<br>Blue shale                        |
|                                                                     |                                              | 16.5 m<br>Red shale                                    |                                             |                                                  |                                                   |                                       |                                             |
| * Throughout this table m refers to “m below ground level (m bgl)”. |                                              |                                                        |                                             |                                                  |                                                   |                                       |                                             |

**Table S3.** Nebraska City – Geological formations at the riverbank filtration site.

| Well #1                                                                                            | Well #2                                                      | Well #3                                                     | Well #4                                             | Well #5                                                             | Well #6                                     | Well #7                                     | Well #8                                                     | Well #9                               | Well #10                          | Well #11                          |
|----------------------------------------------------------------------------------------------------|--------------------------------------------------------------|-------------------------------------------------------------|-----------------------------------------------------|---------------------------------------------------------------------|---------------------------------------------|---------------------------------------------|-------------------------------------------------------------|---------------------------------------|-----------------------------------|-----------------------------------|
| 0-1.8 m<br>Brown<br>sandy soil                                                                     | 0-1.8 m<br>Black<br>sandy soil                               | 0-1.8 m<br>Black<br>sandy soil                              | 0-1.8 m<br>Black<br>sandy clay                      | 0-0.6 m<br>Sandy top<br>soil                                        | 0-2.4 m<br>Fine silty<br>sand               | 0-3.0 m<br>Sandy soil                       | 0-2.1 m<br>Clay                                             | 0-1.5 m<br>Top soil                   | 0-3.4 m<br>Clay                   | 0-3.4 m<br>Sandy clay             |
| 1.8-4.9 m<br>Fine sand<br>and clay                                                                 | 1.8-3.0 m<br>Sandy blue<br>clays and<br>silt                 | 1.8-3.4 m<br>Fine silty<br>sand                             | 1.8-2.4 m<br>Blue clay                              | 0.6-2.4 m<br>Sandy clay                                             | 2.4-3.4 m<br>Blue silty<br>clay             | 3.0-4.3 m<br>Blue clay                      | 2.1-4.3 m<br>Silty gray<br>clay                             | 1.5-11.6 m<br>Silty sand              | 3.4-6.1 m<br>Fine sand            | 3.4-7.6 m<br>Fine sand            |
| 4.9-6.4 m<br>Blue silty<br>clay and<br>fine sand                                                   | 3.0-4.9 m<br>Fine and<br>coarse<br>sand, silty               | 3.4-4.9 m<br>Fine sand                                      | 2.4-4.6 m<br>Fine sand<br>and sandy<br>clay streaks | 2.4-2.7 m<br>Sandy blue<br>clay                                     | 3.4-7.6 m<br>Fine and<br>coarse sand        | 4.3-12.2 m<br>Fine and<br>coarse sand       | 4.3-8.2 m<br>Fine sand                                      | 11.6-15.2 m<br>Fine<br>medium<br>sand | 6.1-19.8 m<br>Sand with<br>gravel | 7.6-25.3 m<br>Sand with<br>gravel |
| 6.4-10.1 m<br>Fine and<br>coarse sand                                                              | 4.9-6.4 m<br>Fine and<br>coarse sand<br>and gravel           | 4.9-6.4 m<br>Coarse and<br>fine sand,<br>trace of<br>gravel | 4.6-4.9 m<br>Streak of<br>blue clay                 | 2.7-5.5 m<br>Fine sand                                              | 7.6-18.3 m<br>Fine and<br>medium<br>sand    | 12.2-15.2 m<br>Fine and<br>medium<br>sand   | 8.2-18.3 m<br>Medium to<br>coarse sand                      | 15.2-18.0 m<br>Fine sand              | 19.8-15.6 m<br>Cobbles            | 25.3-25.6 m<br>Shale              |
| 10.1-12.2 m<br>Fine sand                                                                           | 6.4-9.1 m<br>Coarse<br>sand and<br>gravel                    | 6.4-11.0 m<br>Coarse and<br>fine sand<br>and gravel         | 4.9-6.7 m<br>Coarse and<br>fine sand                | 5.5-10.1 m<br>Fine sand,<br>coarse<br>sand, some<br>small<br>gravel | 18.3-22.9 m<br>Fine and<br>coarse<br>gravel | 15.2-18.3 m<br>Fine and<br>coarse sand      | 18.3-22.9 m<br>Medium to<br>coarse sand<br>and some<br>fine | 18.0-25.0 m<br>Medium<br>coarse sand  |                                   |                                   |
| 12.2-17.7 m<br>Fine and<br>coarse<br>sand,<br>gravel, clay<br>balls and<br>streaks of<br>fine sand | 9.1-11.0 m<br>Fine and<br>coarse<br>sand, trace<br>of gravel | 11.0-12.8 m<br>Fine and<br>coarse sand                      | 6.7-9.8 m<br>Coarse to<br>fine sand<br>and gravel   | 10.1-10.4 m<br>Fine sand                                            | 22.9 m<br>Limestone                         | 18.3-22.3 m<br>Coarse<br>sand and<br>gravel | 22.9-24.4 m<br>Coarse<br>gravel                             | 25.0-25.3 m<br>Clay                   |                                   |                                   |
| 17.7-18.9 m<br>Blue clay<br>with fine                                                              | 11.0-11.3 m<br>Fine sand                                     | 12.8-13.7 m<br>Fine sand                                    | 9.8-12.8 m<br>Fine sand                             | 10.4-15.2 m<br>Coarse and<br>fine sand                              |                                             | 22.3 m<br>Blue shale                        |                                                             | 25.3-28.7 m                           |                                   |                                   |

| and coarse sand                                                               |                                                                       |                                                                          |                                                         | and small gravel                          |         |         |         | Sand and coarse gravel |          |          |
|-------------------------------------------------------------------------------|-----------------------------------------------------------------------|--------------------------------------------------------------------------|---------------------------------------------------------|-------------------------------------------|---------|---------|---------|------------------------|----------|----------|
| <i>continued</i>                                                              |                                                                       |                                                                          |                                                         |                                           |         |         |         |                        |          |          |
| Well #1                                                                       | Well #2                                                               | Well #3                                                                  | Well #4                                                 | Well #5                                   | Well #6 | Well #7 | Well #8 | Well #9                | Well #10 | Well #11 |
| 18.9-22.4 m<br>Fine and coarse sand and gravel, pieces of limestone and shale | 11.3-14.0 m<br>Coarse sand, trace of gravel                           | 13.7-14.6 m<br>Fine sand, limestone chips, few large rocks and blue clay | 12.8-15.2 m<br>Coarse and fine sand and gravel          | 15.2-16.5 m<br>Sand and gravel            |         |         |         |                        |          |          |
| 22.4 m<br>Black shale                                                         | 14.0-17.7 m<br>Fine and coarse sand, trace of gravel                  | 14.6-15.2 m<br>Coarse and fine sand and gravel                           | 15.2-17.4 m<br>Gravel, coarse and fine sand, clay balls | 16.5-17.1 m<br>Fine sand                  |         |         |         |                        |          |          |
|                                                                               | 17.7-19.5 m<br>Fine sand                                              | 15.2-17.1 m<br>Fine sand, clay and trace of coarse sand                  | 17.4-18.9 m<br>Coarse and fine sand                     | 17.1-19.5 m<br>Fine to medium coarse sand |         |         |         |                        |          |          |
|                                                                               | 19.5-20.1 m<br>Fine and coarse sand, trace of gravel, streaks of clay | 17.1-18.6 m<br>Coarse sand and gravel                                    | 18.9-20.4 m<br>Coarse and fine sand, trace of gravel    | 19.5-21.3 m<br>Coarse sand and gravel     |         |         |         |                        |          |          |
|                                                                               | 20.1-21.6 m<br>Fine and coarse sand, trace of gravel                  | 18.6-21.9 m<br>Gravel and coarse sand                                    | 20.4-22.3 m<br>Gravel, coarse sand, boulders and clay   | 21.3 m<br>Limestone                       |         |         |         |                        |          |          |
|                                                                               | 21.6-23.5 m                                                           | 21.9-22.6 m                                                              | 22.3 m                                                  |                                           |         |         |         |                        |          |          |

|                                                                     | Coarse sand, gravel, trace of fine sand and clay balls                    | Gravel and coarse sand, clay balls and trace of fine sand              | Limestone |         |         |         |         |         |          |          |
|---------------------------------------------------------------------|---------------------------------------------------------------------------|------------------------------------------------------------------------|-----------|---------|---------|---------|---------|---------|----------|----------|
| <i>continued</i>                                                    |                                                                           |                                                                        |           |         |         |         |         |         |          |          |
| Well #1                                                             | Well #2                                                                   | Well #3                                                                | Well #4   | Well #5 | Well #6 | Well #7 | Well #8 | Well #9 | Well #10 | Well #11 |
|                                                                     | 23.5-24.4 m<br>Blue clay, very hard                                       | 22.6-23.2 m<br>Coarse and fine sand, coarse gravel and limestone chips |           |         |         |         |         |         |          |          |
|                                                                     | 24.4-25.9 m<br>Fine and coarse sand and gravel                            | 23.3-25.6 m<br>Coarse and fine sand, some gravel                       |           |         |         |         |         |         |          |          |
|                                                                     | 25.9-26.5 m<br>Fine and coarse sand, gravel, lime rock and small boulders | 26.5 m<br>Limestone                                                    |           |         |         |         |         |         |          |          |
|                                                                     | 26.5 m<br>Black shale                                                     |                                                                        |           |         |         |         |         |         |          |          |
| * Throughout this table m refers to “m below ground level (m bgl)”. |                                                                           |                                                                        |           |         |         |         |         |         |          |          |



**Table S4.** Method detection limits.

| Analyte                              | Method detection limit (MDL) |
|--------------------------------------|------------------------------|
| <i>Ion chromatograph</i>             |                              |
| Bromide                              | 0.0239 mg L <sup>-1</sup>    |
| Chloride                             | 0.0238 mg L <sup>-1</sup>    |
| Fluoride                             | 0.0096 mg L <sup>-1</sup>    |
| Nitrate                              | 0.0059 mg L <sup>-1</sup>    |
| Nitrite                              | 0.0047 mg L <sup>-1</sup>    |
| Orthophosphate                       | 0.0517 mg L <sup>-1</sup>    |
| Sulfate                              | 0.0606 mg L <sup>-1</sup>    |
| <i>Total organic carbon analyzer</i> |                              |
| Total organic carbon                 | 0.16 mg L <sup>-1</sup>      |
| Dissolved organic carbon             | 0.16 mg L <sup>-1</sup>      |

**Table S5.** Basic water quality properties (pH, electrical conductivity, EC, total organic carbon, TOC, dissolved organic carbon, DOC) at the two RBF sites and water utilities.

| River<br>Well ID     | pH   |      |      |       | EC ( $\mu\text{S}$ ) |        |        |       | TOC ( $\text{mg L}^{-1}$ ) |       |      |       | DOC ( $\text{mg L}^{-1}$ ) |      |      |       |
|----------------------|------|------|------|-------|----------------------|--------|--------|-------|----------------------------|-------|------|-------|----------------------------|------|------|-------|
|                      | Min  | Max  | Avg  | Stdev | Min                  | Max    | Avg    | Stdev | Min                        | Max   | Avg  | Stdev | Min                        | Max  | Avg  | Stdev |
| <i>Auburn</i>        |      |      |      |       |                      |        |        |       |                            |       |      |       |                            |      |      |       |
| Little Nemaha River  | 6.96 | 8.41 | 7.50 | 0.44  | 304.00               | 551.00 | 447.00 | 76.65 | 1.80                       | 17.60 | 5.99 | 4.69  | 1.58                       | 7.15 | 3.57 | 1.82  |
| 4                    | 6.44 | 8.42 | 7.10 | 0.83  | 441.00               | 497.00 | 473.00 | 22.95 | 0.63                       | 2.70  | 1.19 | 1.01  | 0.70                       | 2.09 | 1.12 | 0.65  |
| 6                    | 6.68 | 8.19 | 7.39 | 0.60  | 520.00               | 687.00 | 623.50 | 65.49 | 0.57                       | 1.01  | 0.79 | 0.15  | 0.27                       | 1.17 | 0.69 | 0.40  |
| 13                   | 6.67 | 8.45 | 7.21 | 0.61  | 460.00               | 578.00 | 533.00 | 34.89 | 0.32                       | 1.40  | 0.72 | 0.34  | 0.23                       | 1.09 | 0.68 | 0.26  |
| Pre                  | 6.88 | 8.42 | 7.31 | 0.55  | 469.00               | 610.00 | 550.00 | 48.05 | 0.32                       | 0.78  | 0.56 | 0.17  | 0.33                       | 1.28 | 0.76 | 0.28  |
| Post                 | 6.65 | 8.26 | 7.18 | 0.56  | 402.00               | 612.00 | 545.55 | 55.87 | 0.35                       | 0.86  | 0.61 | 0.21  | 0.25                       | 2.08 | 0.95 | 0.57  |
| <i>Nebraska City</i> |      |      |      |       |                      |        |        |       |                            |       |      |       |                            |      |      |       |
| Missouri River       | 7.10 | 8.30 | 7.57 | 0.43  | 579.00               | 763.00 | 692.27 | 68.10 | 1.74                       | 10.50 | 5.02 | 2.47  | 1.58                       | 5.78 | 4.46 | 1.52  |
| 2                    | 7.02 | 7.54 | 7.34 | 0.28  | 548.00               | 730.00 | 627.67 | 93.09 | 1.19                       | 2.97  | 2.05 | 0.89  | 1.97                       | 3.19 | 2.44 | 0.66  |
| 3                    | 7.00 | 7.52 | 7.30 | 0.27  | 569.00               | 643.00 | 602.33 | 37.54 | 1.69                       | 3.35  | 2.58 | 0.84  | 1.88                       | 4.56 | 3.23 | 1.34  |
| 4                    | 6.91 | 8.00 | 7.15 | 0.48  | 664.00               | 742.00 | 714.60 | 31.71 | 1.22                       | 2.22  | 1.89 | 0.46  | 1.34                       | 3.31 | 2.55 | 0.85  |
| 5                    | 6.90 | 7.94 | 7.19 | 0.50  | 655.00               | 774.00 | 723.50 | 49.68 | 1.45                       | 2.52  | 1.81 | 0.48  | 1.29                       | 3.27 | 2.52 | 1.07  |
| 8                    | 6.68 | 6.68 | 6.68 | n.a.  | 745.00               | 745.00 | 745.00 | n.a.  | 2.96                       | 2.96  | 2.96 | n.a.  | 3.00                       | 3.00 | 3.00 | n.a.  |
| 9                    | 6.76 | 7.93 | 7.21 | 0.63  | 763.00               | 814.00 | 789.67 | 25.58 | 2.25                       | 2.92  | 2.62 | 0.34  | 2.40                       | 2.40 | 2.40 | n.a.  |
| 10                   | 6.80 | 6.80 | 6.80 | n.a.  | 856.00               | 856.00 | 856.00 | n.a.  | 2.64                       | 2.64  | 2.64 | n.a.  | 2.23                       | 2.23 | 2.23 | n.a.  |
| 11                   | 6.91 | 7.78 | 7.35 | 0.62  | 753.00               | 812.00 | 782.50 | 41.72 | 2.17                       | 2.17  | 2.17 | n.a.  | -                          | -    | -    | n.a.  |
| Pre                  | 6.80 | 8.13 | 7.20 | 0.44  | 513.00               | 802.00 | 720.45 | 87.40 | 1.35                       | 3.38  | 2.19 | 0.78  | 1.35                       | 3.76 | 2.61 | 0.76  |
| Post                 | 6.65 | 8.54 | 7.49 | 0.59  | 385.00               | 541.00 | 467.00 | 45.57 | 1.19                       | 2.00  | 1.55 | 0.27  | 0.61                       | 2.25 | 1.50 | 0.61  |

n.a. Not Applicable, not enough data to estimate the standard deviation. “-” data not available. Pre: Inflow water to the water treatment plants prior to any additional treatment; Post: water collected at the two water treatment plants after chlorination.

**Table S6.** Removal (%) of dissolved organic carbon (DOC) at the two water treatment facilities.

| Well ID          | 06/09/16 | 08/09/16 | 10/14/16 | 12/2/16 | 2/6/17 | 3/10/17 | 4/17/17 | 5/2/17 | 6/22/17 |
|------------------|----------|----------|----------|---------|--------|---------|---------|--------|---------|
| Auburn           |          |          |          |         |        |         |         |        |         |
| 4                | -        | -        | -        | -       | -      | 71      | 53      | 90     | 83      |
| 6                | 74       | -        | 70       | 85      | 54     | -       | -       | -      | -       |
| 13               | 78       | -        | 85       | 76      | 76     | 76      | 75      | 89     | 82      |
| Pre <sup>a</sup> | 83       | -        | 79       | 63      | 74     | 72      | 79      | 90     | 73      |
| Nebraska City    |          |          |          |         |        |         |         |        |         |
| 2                | -        | -        | -        | 27      | 63     |         |         | -      | 40      |
| 3                | -        | -        | -        | 30      | 21     |         |         | -      | 39      |
| 4                | -        | -        | 15       | -       | -      | 42      | 43      | -      | -       |
| 5                | -        | -        | 18       | -       | -      | 35      | 43      | -      | -       |
| 8                | -        | -        | -        | -       | -      | -       | -       | 42     | -       |
| 9                | 52       | -        | -        | -       | -      | -       | -       | 40     | -       |
| 10               | 56       | -        | -        | -       | -      | -       | -       | -      | -       |
| 11               | -        | -        | -        | -       | -      | -       | -       | -      | -       |
| Pre <sup>a</sup> | 55       | -        | 14       | 24      | 51     | 47      | 35      | 44     | 36      |

<sup>a</sup> Pre: Inflow water to the water treatment plant prior to any additional treatment. -: not available since the two towns run only two to three wells simultaneously. In Auburn, well 4 is not being used due to the high levels of nitrate.

**Table S7.** Trihalomethanes at the two water treatment plants.

| Analyte              | Auburn*                         |                                 |                                 |       | Nebraska City*                  |                                 |                                 |       |
|----------------------|---------------------------------|---------------------------------|---------------------------------|-------|---------------------------------|---------------------------------|---------------------------------|-------|
|                      | Min<br>( $\mu\text{g L}^{-1}$ ) | Max<br>( $\mu\text{g L}^{-1}$ ) | Avg<br>( $\mu\text{g L}^{-1}$ ) | Stdev | Min<br>( $\mu\text{g L}^{-1}$ ) | Max<br>( $\mu\text{g L}^{-1}$ ) | Avg<br>( $\mu\text{g L}^{-1}$ ) | Stdev |
| Bromoform            | 1.31                            | 11.27                           | 4.22                            | 2.89  | 0.37                            | 11.44                           | 3.06                            | 3.03  |
| Chloroform           | 1.16                            | 4.03                            | 2.84                            | 0.87  | 15.62                           | 53.82                           | 26.97                           | 12.92 |
| Dichlorobromomethane | 3.24                            | 14.97                           | 5.67                            | 3.42  | 3.85                            | 27.88                           | 16.22                           | 8.58  |
| Dibromochloromethane | 3.24                            | 12.92                           | 7.32                            | 3.11  | 4.50                            | 18.67                           | 11.24                           | 4.59  |
| Total THMs           | 11.17                           | 30.47                           | 20.05                           | 6.63  | 28.88                           | 98.54                           | 57.48                           | 25.62 |

\*Water samples were collected at the two water treatment plants after chlorination.
